# Supplementary material for: Nephrological Complications in Hemoglobinopathies: SITE Good Practice
Source: MDPI journal article supplement (doi:10.3390/jcm12237476), 2023-12-02

**Figure S1. Flow-chart** for clinical management of albuminuria in patients with hemoglobinopathies

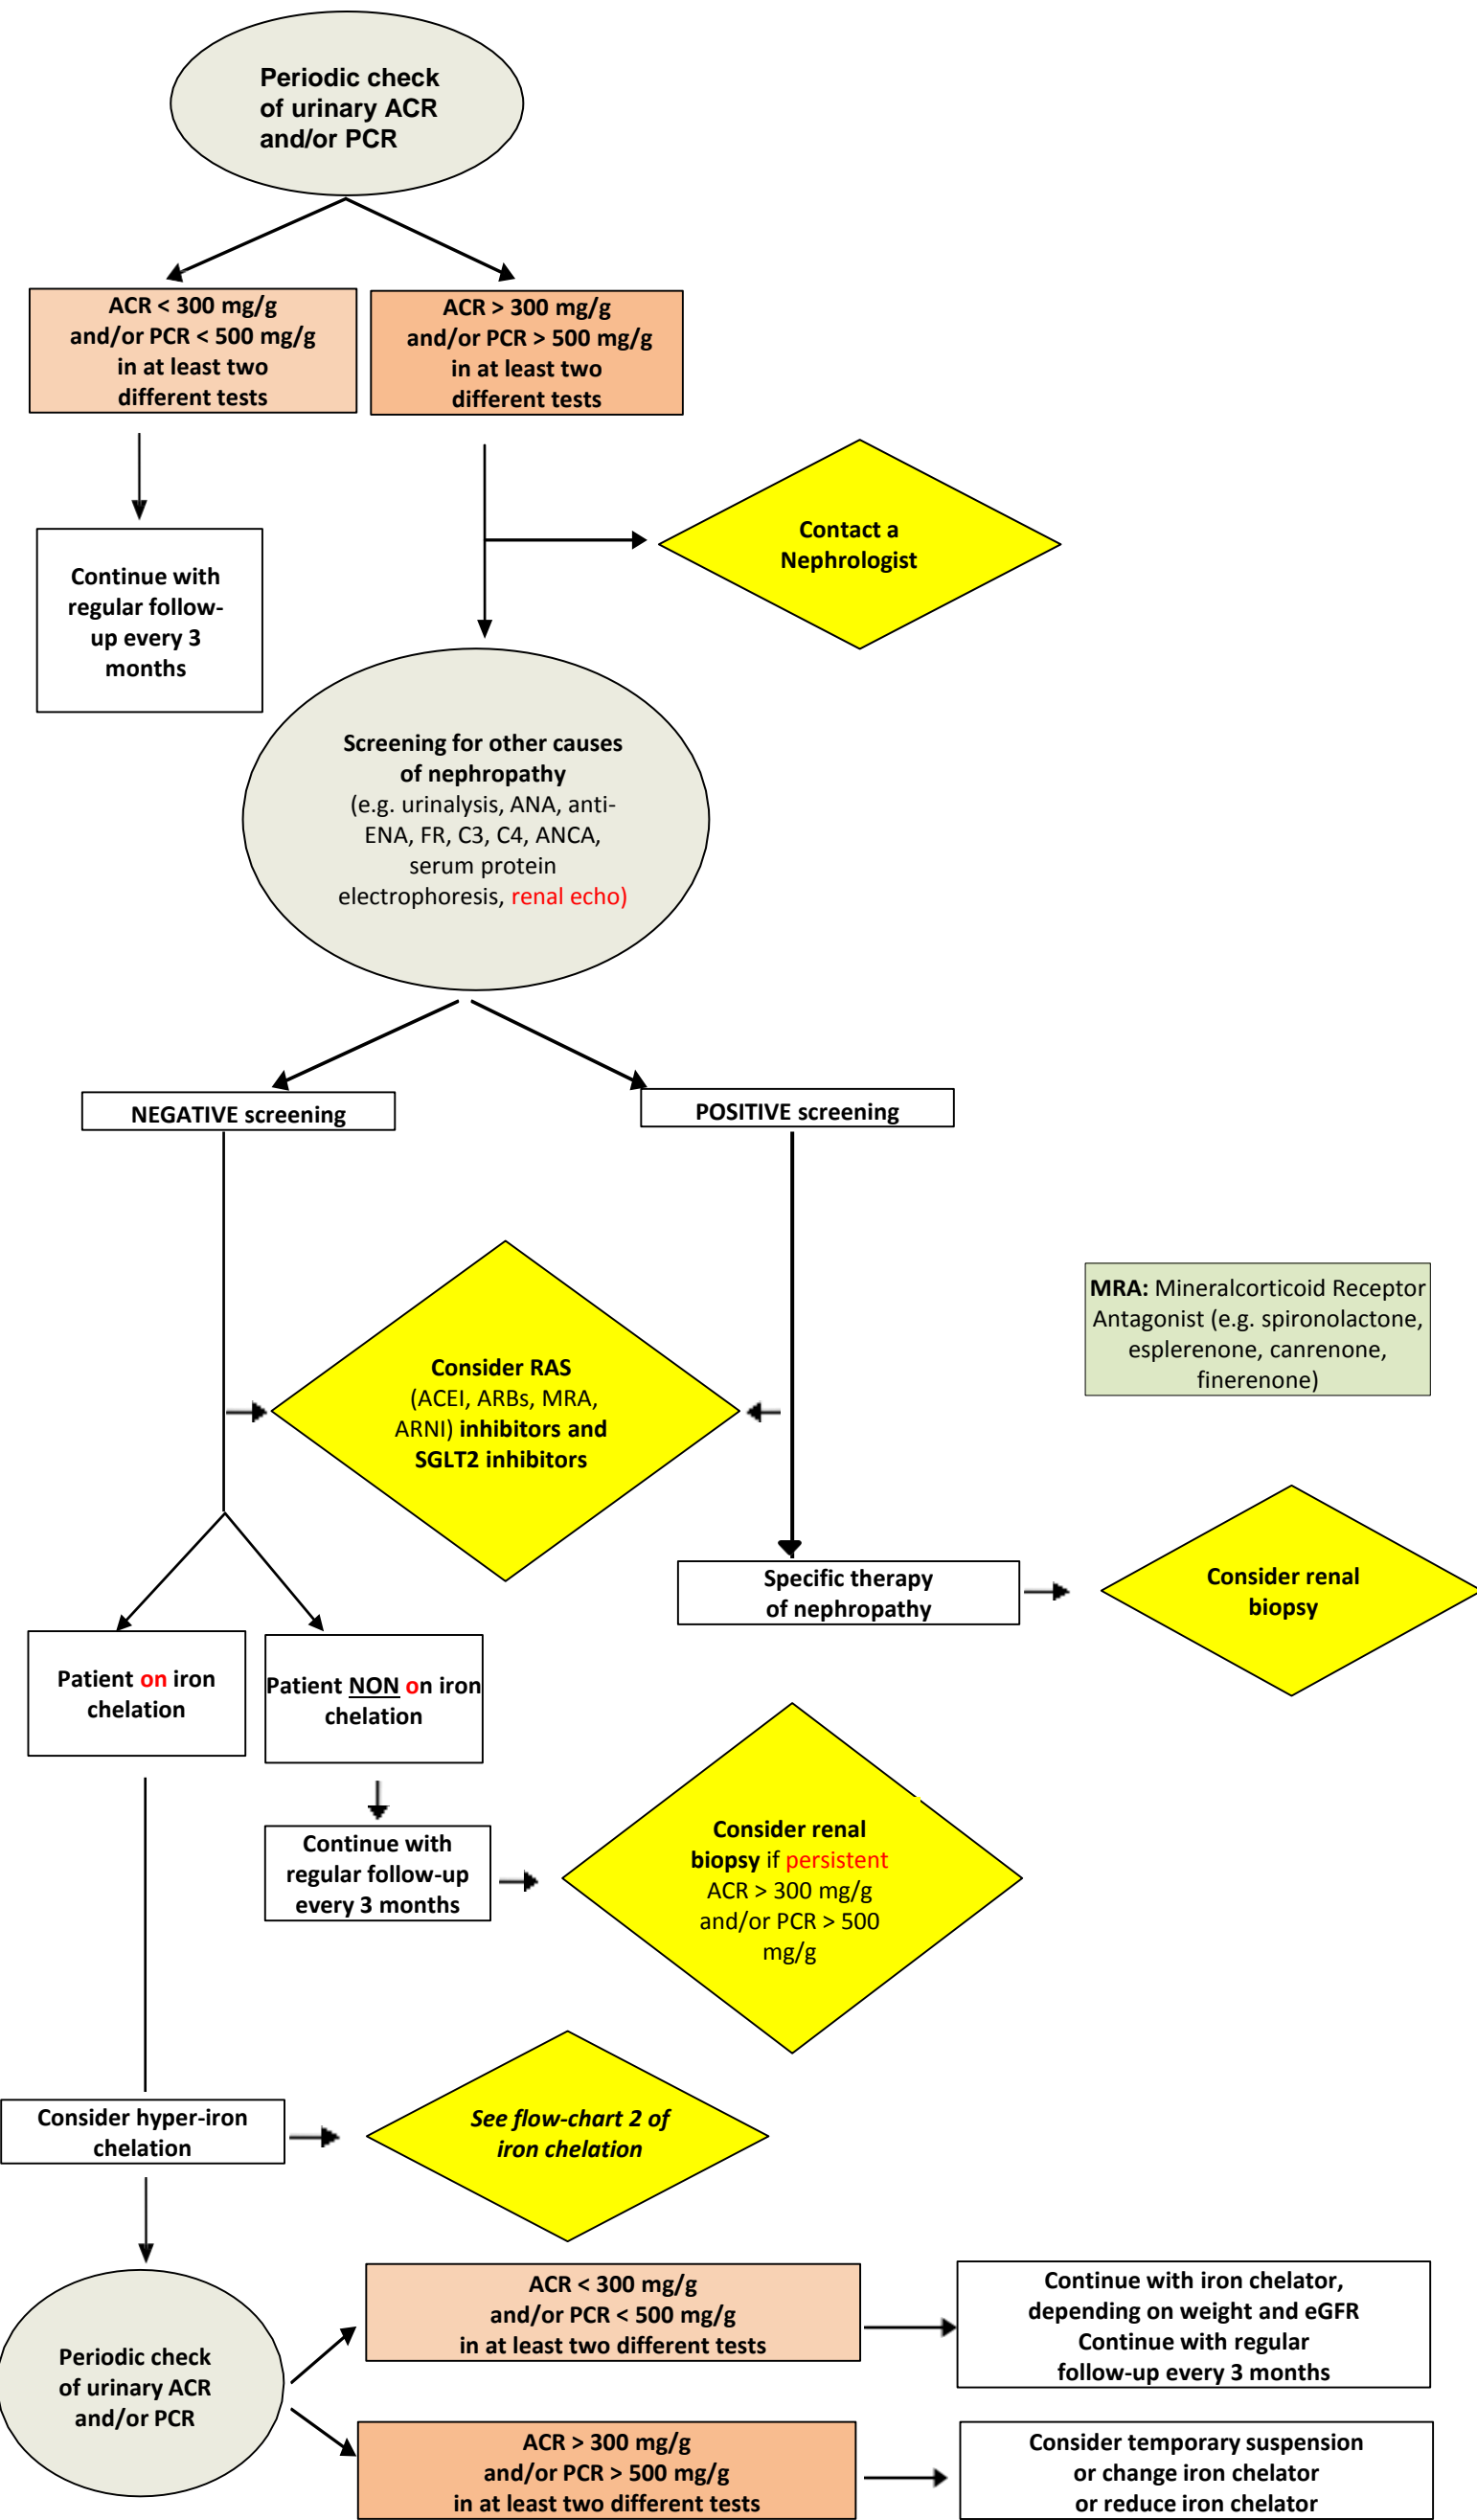

**Figure S2. Flow-chart** for clinical management of iron chelation therapy in patients with hemoglobinopathies and enal function alteration

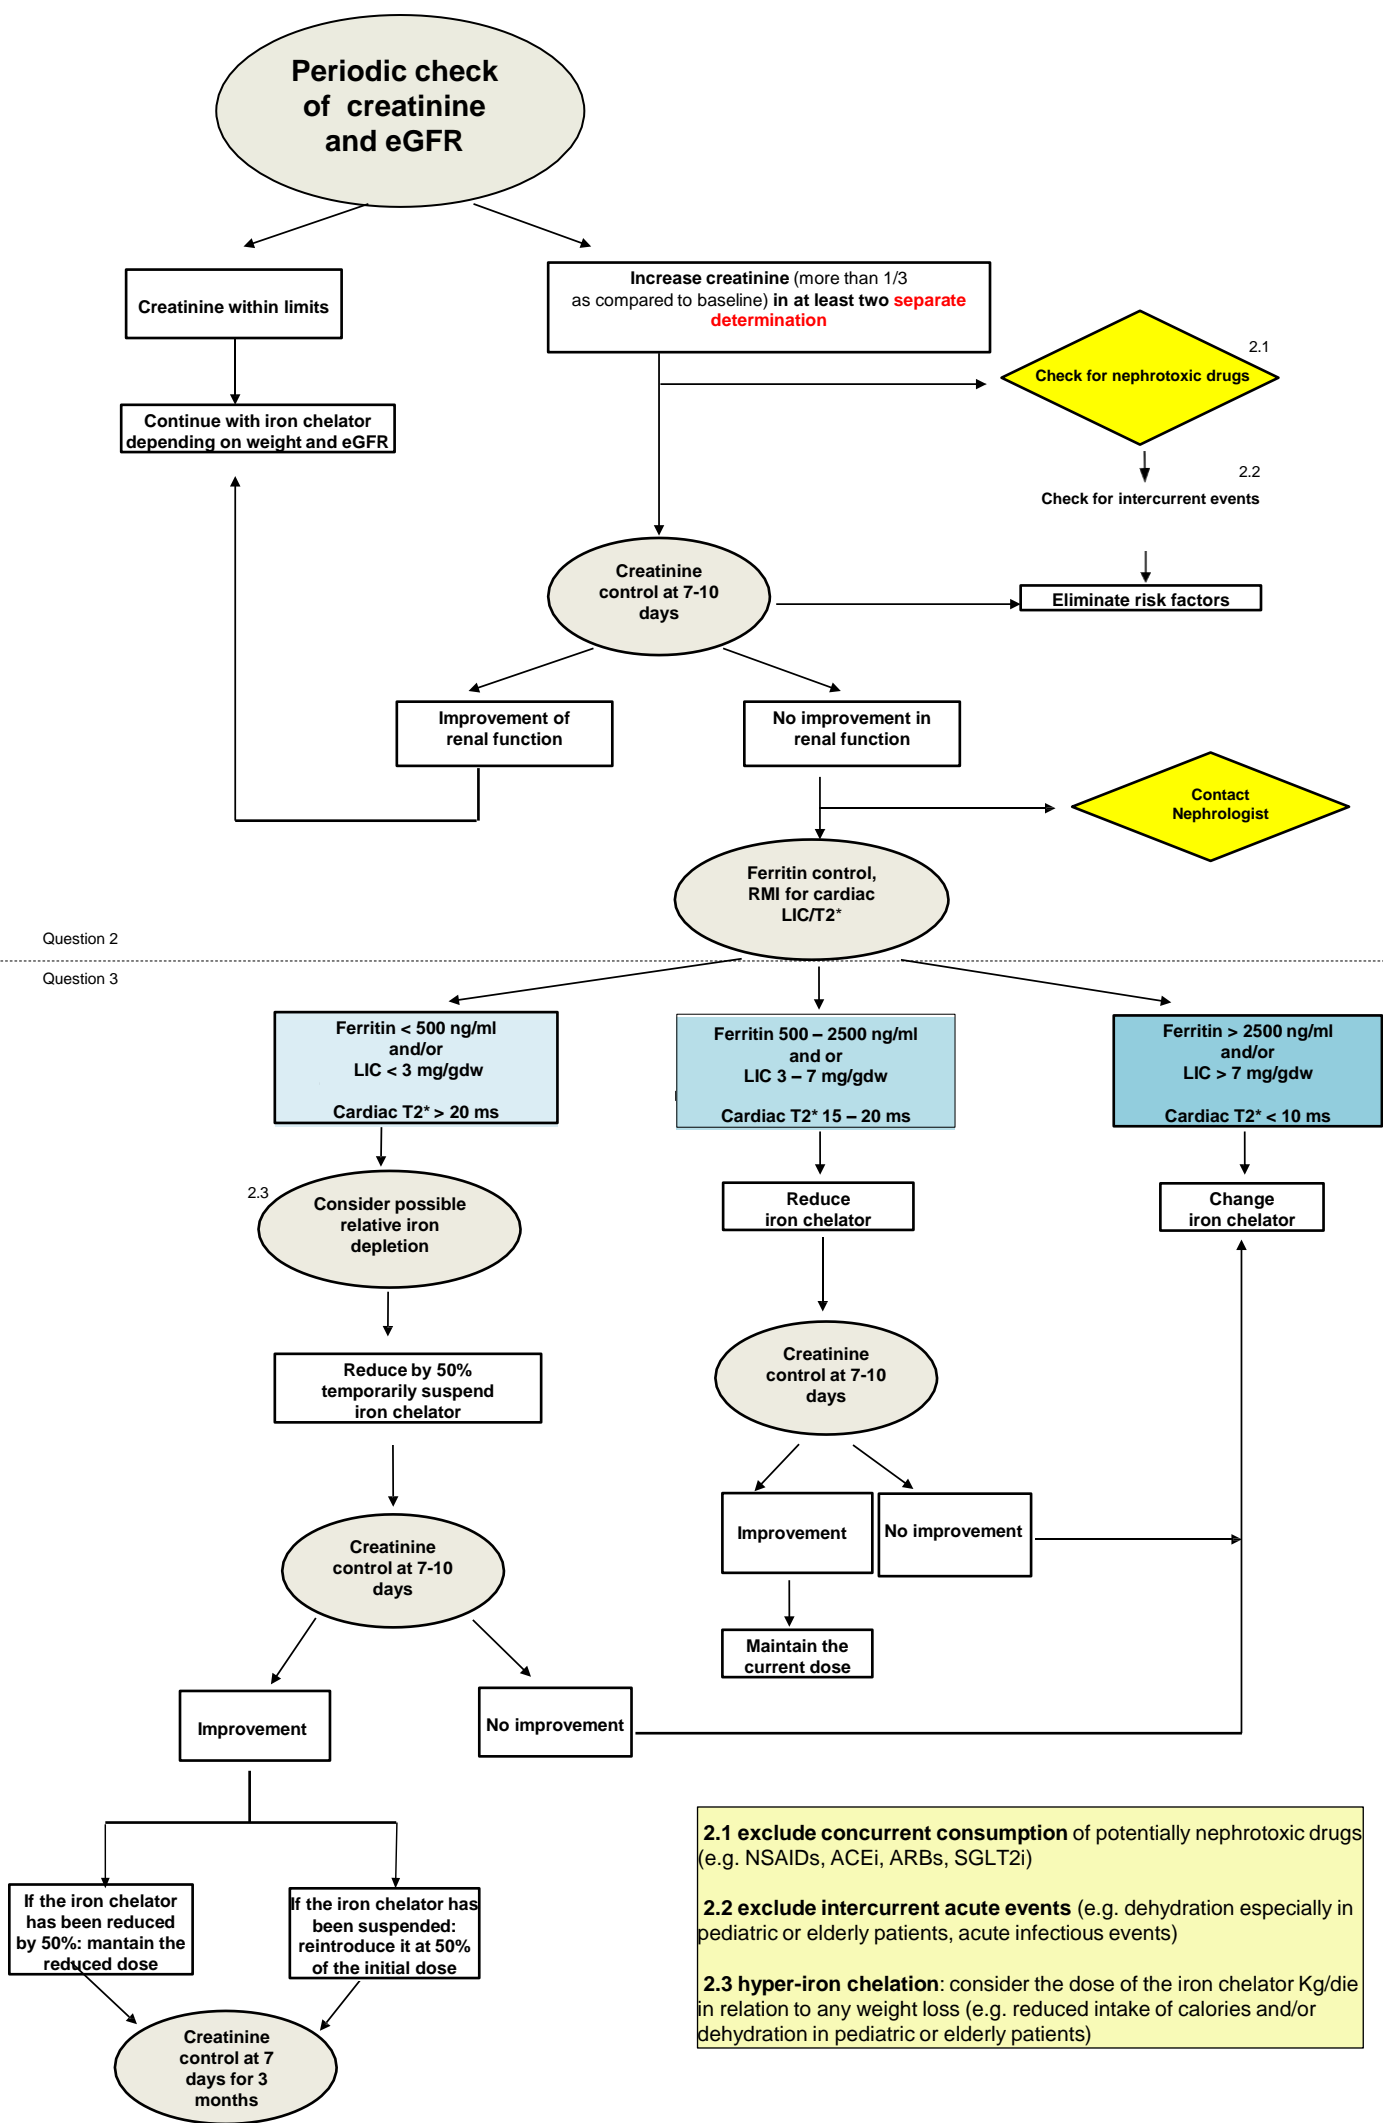

Supplement: s1 [file s1]
